# Supplementary material for: Divergent self-assembly propensity of enantiomeric phenylalanine amphiphiles that undergo pH-induced nanofiber-to-nanoglobule conversion
Source: Royal Society of Chemistry journal article supplement (doi:10.1039/d4sm00117f), 2024-01-01
Supplement: d4sm00117f1.pdf [file d4sm00117f1.pdf]

## Electronic Supporting Information

### Divergent Self-Assembly Propensity of Enantiomeric Phenylalanine Amphiphiles that Undergo pH-Induced Nanofiber-to-Nanoglobule Conversion

Manas Kumar Pradhan, Nayanika Misra, Fathima Sahala, Nyaya Prakash Pradhan, Aasheesh Srivastava\*

*Department of Chemistry, IISER Bhopal, Bhopal 462066, Madhya Pradesh India.*

*Email: [asrivastava@iiserb.ac.in](mailto:asrivastava@iiserb.ac.in) Homepage: <https://sites.google.com/iiserb.ac.in/aslab/home>*

### Contents

|                                                                                |     |
|--------------------------------------------------------------------------------|-----|
| <b>1.0 Experimental Section</b> .....                                          | S3  |
| <b>1.1 Materials</b> .....                                                     | S3  |
| <b>1.2 Representative Synthesis of L/D-NapF-EDA</b> .....                      | S3  |
| <b>1.3 Transmission Electron Microscopy (TEM)</b> .....                        | S3  |
| <b>1.4 Rheology</b> .....                                                      | S3  |
| <b>1.5 Gel Melting Point</b> .....                                             | S4  |
| <b>1.6 Investigation into pH responsiveness</b> .....                          | S4  |
| <b>1.7 pH-dependent reversibility</b> .....                                    | S4  |
| <b>1.8 Tyndall effect</b> .....                                                | S4  |
| <b>1.9 Data fitting</b> .....                                                  | S4  |
| <b>1.10 Computational studies</b> .....                                        | S4  |
| <b>2.0 Supporting Figures</b> .....                                            | S9  |
| <b>2.1 Synthetic Scheme</b> .....                                              | S9  |
| <b>2.2 HT values of NapF-EDA</b> .....                                         | S9  |
| <b>2.3 TEM images of self-assembly of PDAs</b> .....                           | S9  |
| <b>2.4 CD ellipticity values at 298 K for the two enantiomers</b> .....        | S10 |
| <b>2.5 VT CD ellipticity values for the two enantiomers</b> .....              | S10 |
| <b>2.6 Absorbance plot of VT CD samples</b> .....                              | S10 |
| <b>2.7 CD signals of both enantiomers before and after self-assembly</b> ..... | S11 |
| <b>2.8 pH-responsive reversibility of self-assembly</b> .....                  | S11 |
| <b>2.9 Tyndall effect of NapF-EDA self-assembly</b> .....                      | S12 |
| <b>2.10 pH-responsive Zeta potential of both the enantiomers</b> .....         | S12 |
| <b>2.11 HT values for pH-dependent CD study</b> .....                          | S13 |

|                                                                                                |     |
|------------------------------------------------------------------------------------------------|-----|
| <b>2.12 pH-dependent reversible morphology change</b> .....                                    | S13 |
| <b>2.13 Summary of differences in the self-assembling behaviour of L- and D-NapF-EDA</b> ..... | S14 |
| <b>2.14 NMR and Mass data</b> .....                                                            | S15 |
| <b>3.0 References</b> .....                                                                    | S17 |

## 1.0 Experimental Section

### 1.1 Materials

All the chemicals mentioned were procured from commercial sources and were of the highest purity available. L-Phenylalanine (F), 1-Naphthylacetic acid (NAA), 1,1-Carbonyldiimidazole (CDI), and ethylenediamine (EDA) were purchased from Spectrochem and used without further purification. Solvents used in the synthesis were further purified, dried, or distilled, as required. Milli-Q water was used during the synthesis. Nuclear Magnetic Resonance (NMR) spectra were recorded on Bruker's AVANCE-III (500 MHz) spectrometers using D<sub>2</sub>O, CDCl<sub>3</sub>, and DMSO-*d*<sub>6</sub> as solvents, and the chemical shifts are reported in ppm. High-Resolution Mass Spectrometry (HRMS) was recorded by electrospray ionization (ESI) mode using Agilent LCQTOF instrument.

### 1.2 Representative Synthesis of L/D-NapF-EDA

200 mg L-NapF-OMe (synthesis and characterization of NapF-OMe was reported in our previous publication)<sup>1</sup> (1 eq., 0.58 mmol) was dissolved in EtOH (3 mL). In another RB dry ethylenediamine (200  $\mu$ L, 1.44 mmol) was dissolved in EtOH (1 mL). L-NapF-OMe solution was added dropwise to the amine solution with stirring. After addition reaction was brought to reflux. The reaction was monitored by TLC. The complete consumption of starting material was observed after 36 h. Ethanol was removed by a rotary evaporator. The product was extracted by workup with CHCl<sub>3</sub> and NaHCO<sub>3</sub> solution. The chloroform layer was dried over anhyd. sodium sulfate. Chloroform was removed by rotary evaporator; the obtained solid was washed with diethyl ether and pentane. This resulted in an off-white solid with a 70 % yield (see Fig. S1).

<sup>1</sup>H NMR of **L-NapF-EDA** (500 MHz, CDCl<sub>3</sub>)  $\delta$  7.81 (s, 2H), 7.76 (d, *J* = 8.3 Hz, 1H), 7.47 – 7.41 (m, 2H), 7.36 (t, *J* = 7.4 Hz, 1H), 7.26 (d, *J* = 6.6 Hz, 1H), 7.03 (d, *J* = 7.2 Hz, 3H), 6.77 (d, *J* = 6.6 Hz, 2H), 5.98 (s, 1H), 5.85 (d, *J* = 6.6 Hz, 1H), 4.50 (d, *J* = 7.1 Hz, 1H), 3.92 (s, 2H), 3.03 (d, *J* = 5.5 Hz, 2H), 2.85 (dd, *J* = 13.6, 6.5 Hz, 1H), 2.71 (dd, *J* = 13.6, 7.0 Hz, 1H), 2.56 – 2.45 (m, 2H).

<sup>1</sup>H NMR of **D-NapF-EDA** (500 MHz, CDCl<sub>3</sub>)  $\delta$  7.82 (m, 6.4, 3.7 Hz, 2H), 7.76 (d, *J* = 8.3 Hz, 1H), 7.47 – 7.42 (m, 2H), 7.37 (dd, *J* = 8.2, 7.1 Hz, 1H), 7.26 (d, *J* = 7.3 Hz, 1H), 7.07 – 7.01 (m, 3H), 6.80 – 6.76 (m, 2H), 5.96 (s, 1H), 5.85 (d, *J* = 7.6 Hz, 1H), 4.50 (dd, *J* = 14.4, 7.2 Hz, 1H), 3.92 (s, 2H), 3.02 (q, *J* = 5.9 Hz, 2H), 2.88 – 2.81 (m, 1H), 2.71 (dd, *J* = 13.6, 7.1 Hz, 1H), 2.50 (m, 2H). HR-LCMS: *m/z* calculated for C<sub>23</sub>H<sub>25</sub>N<sub>3</sub>O<sub>2</sub> [M+H<sup>+</sup>] is 376.19; found: 376.20.

### 1.3 Transmission Electron Microscopy (TEM)

For TEM, samples were prepared on Formvar/carbon film-coated 400 mesh copper grids (Ted Pella). Before adding the sample, the grid was stained using 0.3 w/v% phosphotungstic acid for 20 seconds. Then 10  $\mu$ L of self-assemblies (0.3 mM) was dropped on the grid and left for 120 s and the excess material was bloated out. The grid was dried inside a vacuum desiccator at RT for 12 h. TEM images were recorded after completed drying the samples.

### 1.4 Rheology

For the strain sweep experiments, a 25 mm diameter, 1° angle cone was used at the top and a flat plate was used at the bottom. The samples were placed on the bottom plate. A 0.05 mm

gap distance was maintained between the cone plate and the flat plate. All the rheological studies were performed at 298 K on the hydrogel (3 mg/mL). Strain sweep tests were performed from 1% to 100% strain at a constant frequency of 10 rad·s<sup>-1</sup>. Variable temperature (VT) rheological studies were also done at constant amplitude (1% strain) and frequency (10 rad·s<sup>-1</sup>).

### 1.5 Determination of the Gel Melting Point

The gel melting point was determined by the “inverse flow method”. Hydrogels were prepared in two separate glass vials at the concentration of 3 mg·mL<sup>-1</sup>, 8 mM of each enantiomer. The vials were inverted and a thermometer was attached to them for recording the temperature. This assembly was immersed inside a water bath with stirring on a hot plate at ambient temperature (298 K). The temperature of the water bath was increased at *ca.* 5 °C·min<sup>-1</sup>. The temperature range at which the first and last drop of gel mass fell was recorded as the gel melting range temperature.

### 1.6 Investigation into pH responsiveness

To investigate the effect of pH on the nanostructures formed by the self-assembly of L-NapF-EDA (0.3 mg·mL<sup>-1</sup>, 0.8 mM), soluble self-assemblies were prepared in five different vials. The pH of the respective solution was adjusted to 5, 6, 7, 8, and 9 by the addition of HCl (1 N) and NaOH (1 N). Optical properties and morphology were studied using CD and TEM.

### 1.7 pH-dependent reversibility

To investigate the pH-dependent reversibility of enantiomeric self-assembly, 1.5 mg/mL (4 mM) of L-NapF-EDA was used for the hydrogelation. The pH of the gel (inherent pH ~ 8) was reduced to acidic (~ 6) by adding dil. HCl, which led to degradation of gel to sol. After 30 min, pH of the sol was again increased to basic (~8), which allowed the sol to reassemble. The turbidity of the sol also increased after pH adjustment to ~ 8. Digital photos were taken in each step of the reversibility. Diluted the samples to 0.8 mM and recorded the TEM data.

### 1.8 Tyndall effect

For tyndall effect, self-assembly were prepared at concentration 0.3 mg/mL (0.8 mM) for both the L- and D-NapF-EDA enantiomers. Absorbance was recorded at wavelength range 400-800 nm at a constant temperature 25 °C.

### 1.9 Data fitting

Temperature-dependent experimental data was fitted in isodesmic model which was previously established by Meijer and coworkers.<sup>2</sup> All heating curves obtained are studied at a slow heating rate of 1.0 K·min<sup>-1</sup> to ensure the self-assembly processes were under thermodynamic control.

### 1.10 Computational studies

The structure of L- and D-NapF-EDA were optimized using Gaussian 09<sup>5</sup> software using the following parameters.

Basis set = B3LYP

Level of theory = 6-311++G(d,p)

Charge = 0

Multiplicity = 1

**D-NapF-EDA**

| <b>Symbol</b> | <b>X</b> | <b>Y</b> | <b>Z</b> |
|---------------|----------|----------|----------|
| C1            | -2.6334  | 1.589726 | -1.97458 |
| C2            | -2.57208 | 1.138903 | -0.67728 |
| C3            | -2.98988 | -0.17568 | -0.3314  |
| C4            | -3.47472 | -1.02476 | -1.38173 |
| C5            | -3.52737 | -0.52533 | -2.70965 |
| C6            | -3.11788 | 0.751856 | -3.00358 |
| H7            | -2.29894 | 2.59346  | -2.21032 |
| H8            | -2.18032 | 1.797075 | 0.087417 |
| C9            | -2.94752 | -0.68308 | 1.009094 |
| C10           | -3.89367 | -2.34459 | -1.07635 |
| H11           | -3.89643 | -1.17799 | -3.49408 |
| H12           | -3.16049 | 1.118681 | -4.02295 |
| C13           | -3.84273 | -2.81035 | 0.213327 |
| C14           | -3.37342 | -1.97451 | 1.249156 |
| H15           | -4.25518 | -2.97814 | -1.87945 |
| H16           | -4.16589 | -3.81883 | 0.445629 |
| H17           | -3.35174 | -2.35721 | 2.264605 |
| C18           | -2.46372 | 0.152921 | 2.173497 |
| H19           | -2.76415 | 1.199469 | 2.066279 |
| H20           | -2.93512 | -0.19416 | 3.094825 |
| C21           | -0.95949 | 0.170577 | 2.490523 |
| O22           | -0.56746 | 0.541621 | 3.591927 |
| N23           | -0.11223 | -0.21579 | 1.506975 |
| H24           | -0.45466 | -0.57395 | 0.622869 |
| C25           | 1.318491 | -0.31084 | 1.714688 |
| H26           | 1.492101 | -0.80548 | 2.677662 |
| C27           | 2.02549  | 1.077145 | 1.811478 |
| H28           | 3.101936 | 0.904627 | 1.915069 |
| H29           | 1.683498 | 1.523311 | 2.746246 |
| C30           | 1.765743 | 2.034929 | 0.67079  |
| C31           | 0.825054 | 3.060693 | 0.817261 |
| C32           | 2.459005 | 1.938766 | -0.54137 |
| C33           | 0.580611 | 3.962721 | -0.21706 |

|     |          |          |          |
|-----|----------|----------|----------|
| H34 | 0.290471 | 3.15925  | 1.756531 |
| C35 | 2.215771 | 2.83591  | -1.57897 |
| H36 | 3.201646 | 1.159268 | -0.67468 |
| C37 | 1.274277 | 3.851655 | -1.42049 |
| H38 | -0.14502 | 4.75712  | -0.07906 |
| H39 | 2.765044 | 2.745086 | -2.50965 |
| H40 | 1.089522 | 4.554658 | -2.22511 |
| C41 | 1.88011  | -1.21381 | 0.60199  |
| O42 | 1.216976 | -1.51986 | -0.37769 |
| N43 | 3.152496 | -1.65363 | 0.798707 |
| H44 | 3.628279 | -1.38788 | 1.646312 |
| C45 | 3.824091 | -2.55936 | -0.13038 |
| H46 | 4.559007 | -3.13569 | 0.439011 |
| H47 | 3.088593 | -3.25754 | -0.53141 |
| C48 | 4.512498 | -1.83388 | -1.29375 |
| H49 | 5.162644 | -1.04092 | -0.89122 |
| H50 | 3.743277 | -1.34934 | -1.89897 |
| N51 | 5.214043 | -2.80741 | -2.13246 |
| H52 | 5.422984 | -2.42852 | -3.04833 |
| H53 | 6.091023 | -3.10024 | -1.71501 |

| Item                 | Value    | Threshold | Converged ? |
|----------------------|----------|-----------|-------------|
| Maximum Force        | 0.000004 | 0.00045   | YES         |
| RMS Force            | 0.000001 | 0.0003    | YES         |
| Maximum Displacement | 0.000401 | 0.0018    | YES         |
| RMS Displacement     | 0.000097 | 0.0012    | YES         |

### L-NapF-EDA

| <b>Symbol</b> | <b>X</b> | <b>Y</b> | <b>Z</b> |
|---------------|----------|----------|----------|
| C1            | -2.8274  | 0.820876 | 2.826862 |
| C2            | -2.42396 | -0.24434 | 2.05731  |
| C3            | -3.13323 | -0.62768 | 0.884937 |
| C4            | -4.29436 | 0.139451 | 0.529389 |
| C5            | -4.68438 | 1.232729 | 1.348004 |
| C6            | -3.97065 | 1.570478 | 2.4712   |
| H7            | -2.26308 | 1.088263 | 3.713057 |
| H8            | -1.54468 | -0.79625 | 2.363511 |
| C9            | -2.75429 | -1.73038 | 0.051452 |
| C10           | -5.03337 | -0.20429 | -0.63088 |
| H11           | -5.56608 | 1.799743 | 1.067079 |
| H12           | -4.28079 | 2.407563 | 3.08643  |
| C13           | -4.6479  | -1.26444 | -1.41256 |
| C14           | -3.51057 | -2.02397 | -1.06591 |
| H15           | -5.90839 | 0.383556 | -0.88779 |
| H16           | -5.21455 | -1.52733 | -2.29874 |
| H17           | -3.21444 | -2.8545  | -1.69703 |
| C18           | -1.53241 | -2.58781 | 0.339656 |
| H19           | -1.2115  | -2.4972  | 1.377416 |
| H20           | -1.7805  | -3.63598 | 0.165915 |
| C21           | -0.37342 | -2.27059 | -0.61264 |
| O22           | -0.27931 | -2.80315 | -1.71161 |
| N23           | 0.520656 | -1.34914 | -0.16843 |
| H24           | 0.479682 | -0.97774 | 0.771849 |
| C25           | 1.70174  | -0.98995 | -0.9267  |
| C26           | 2.762396 | -0.517   | 0.082264 |
| O27           | 2.474827 | -0.25872 | 1.242545 |
| N28           | 4.02215  | -0.39886 | -0.41382 |
| H29           | 4.19484  | -0.70266 | -1.35939 |
| C30           | 5.150739 | 0.052231 | 0.395198 |
| H31           | 5.868829 | 0.540756 | -0.27046 |
| H32           | 4.790816 | 0.797387 | 1.104446 |
| C33           | 5.834726 | -1.08692 | 1.162582 |
| H34           | 6.08238  | -1.89843 | 0.459977 |
| H35           | 5.122349 | -1.49083 | 1.885309 |
| N36           | 6.989108 | -0.56224 | 1.8945   |

|     |          |          |          |
|-----|----------|----------|----------|
| H37 | 7.290063 | -1.2005  | 2.621324 |
| H38 | 7.781278 | -0.40224 | 1.281177 |
| C39 | 1.412854 | 0.055867 | -2.04697 |
| H40 | 0.662709 | -0.39937 | -2.69748 |
| H41 | 2.320424 | 0.171585 | -2.64791 |
| C42 | 0.943812 | 1.410447 | -1.56707 |
| C43 | 1.85113  | 2.459289 | -1.37647 |
| C44 | -0.41011 | 1.646132 | -1.30008 |
| C45 | 1.422397 | 3.705635 | -0.9245  |
| H46 | 2.903688 | 2.300827 | -1.58862 |
| C47 | -0.84224 | 2.889709 | -0.84369 |
| H48 | -1.13287 | 0.85275  | -1.45405 |
| C49 | 0.072867 | 3.923614 | -0.65378 |
| H50 | 2.14135  | 4.50576  | -0.78632 |
| H51 | -1.89482 | 3.048843 | -0.63825 |
| H52 | -0.26338 | 4.892724 | -0.30237 |
| H53 | 2.062973 | -1.89446 | -1.42796 |

| Item                 | Value    | Threshold | Converged<br>? |
|----------------------|----------|-----------|----------------|
| Maximum Force        | 0.000009 | 0.00045   | YES            |
| RMS Force            | 0.000002 | 0.0003    | YES            |
| Maximum Displacement | 0.001604 | 0.0018    | YES            |
| RMS Displacement     | 0.000394 | 0.0012    | YES            |



## 2.0 Supporting Figures

### 2.1 Synthetic Scheme

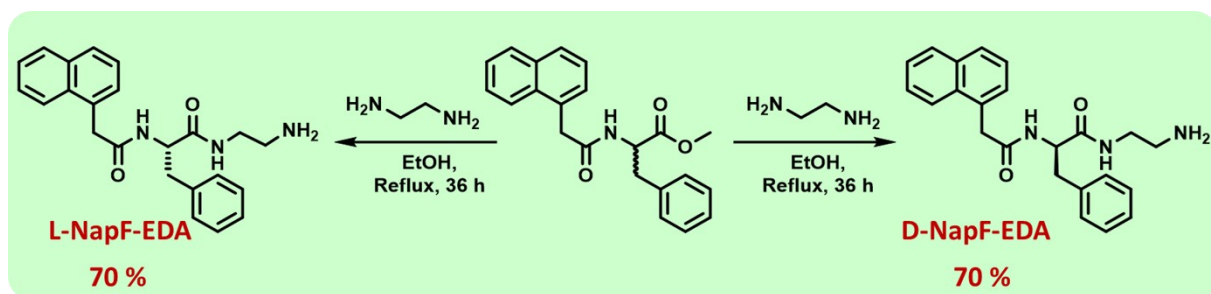

**Figure S1:** General synthetic scheme of different organic precursors (see section 1.2).

### 2.2 HT values of NapF-EDA

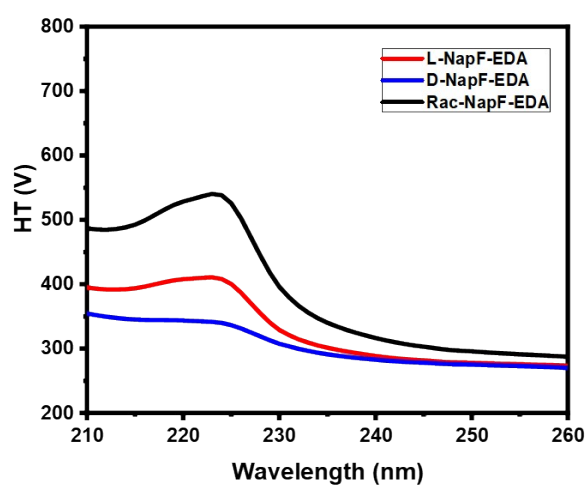

**Figure S2:** HT values obtained from CD instrument during the collection of CD data reported in Figure 1B. HT values upto 800 V are considered within permissible limits.

### 2.3 TEM images of self-assembly of PDAs

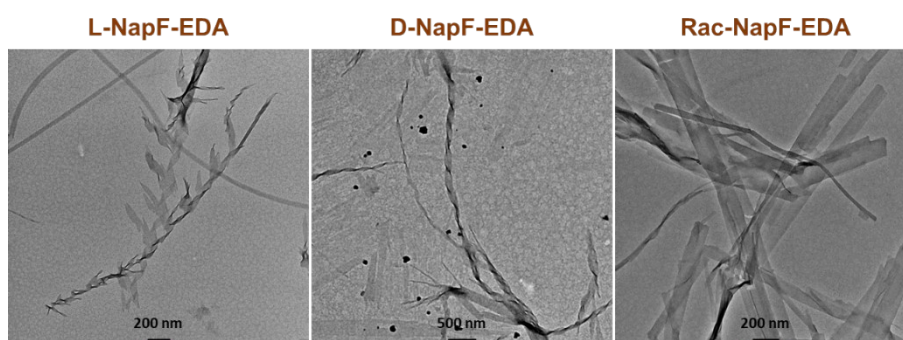

**Figure S3:** TEM morphology characterization of the self-assemblies formed by L-NapF-EDA, D-NapF-EDA, and their racemic mixture (Rac-NapF-EDA) at pH ~8. The concentration used for the study was 1 mg/mL.

## 2.4 CD ellipticity values at 298 K for the two enantiomers

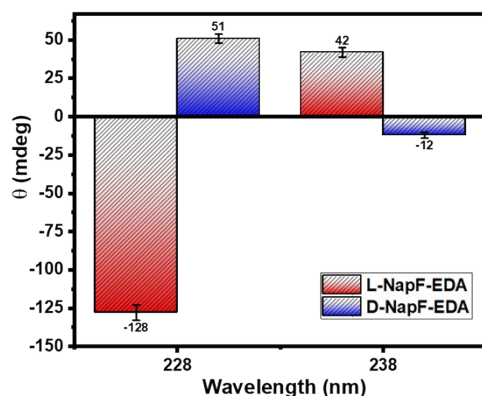

**Figure S4:** Ellipticity values of L- and D-NapF-EDA at 228 and 238 nm.

## 2.5 VT CD ellipticity values for the two enantiomers

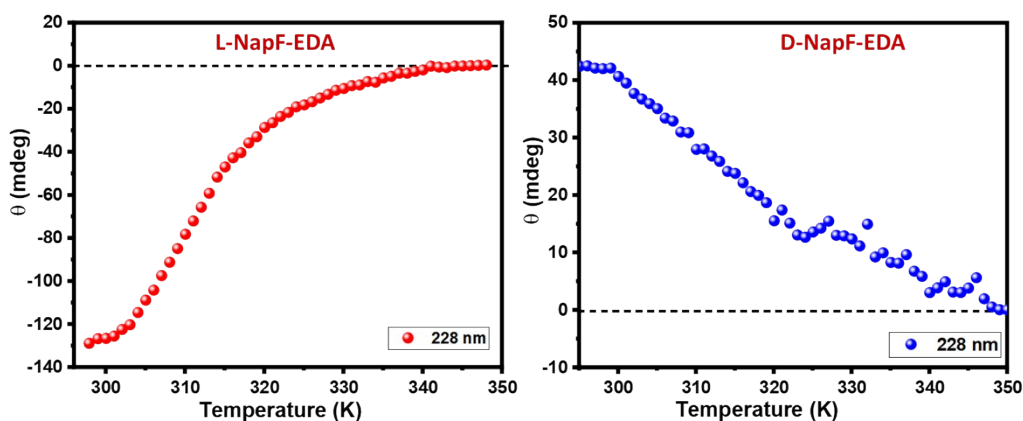

**Figure S5:** Temperature-dependent ellipticity (mdeg) values of L- and D-NapF-EDA (0.5 mg/mL) at 228 nm for the temperature range 298-348 K.

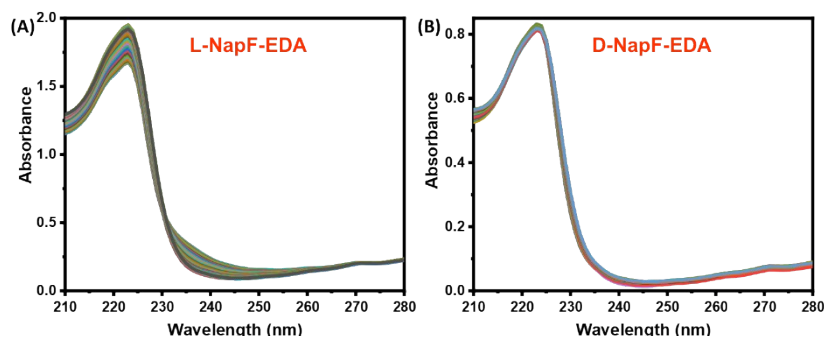

**Figure S6:** Absorbance data corresponding to the heating profile of both enantiomers (A) L-NapF-EDA and (B) D-NapF-EDA, obtained from CD instrument during the VT CD experiments at 0.5 mg/mL concentration.

## 2.6 Absorbance plot of VT CD samples

## 2.7 CD signals of both enantiomers before and after self-assembly

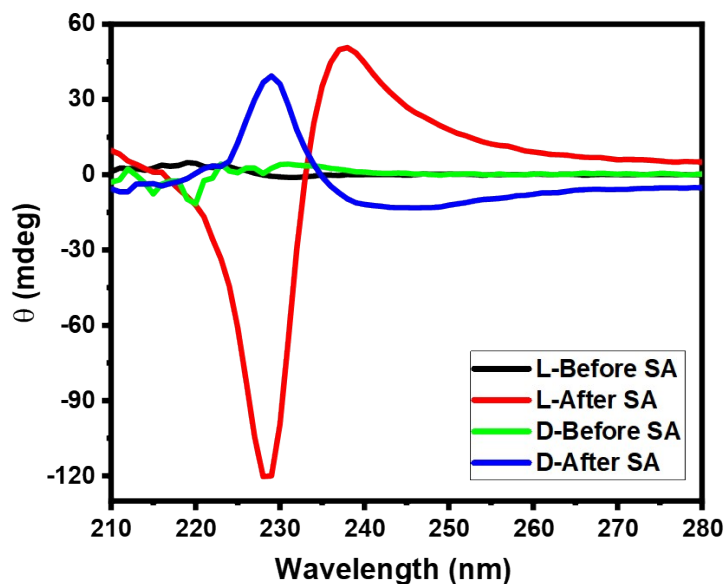

**Figure S7:** CD signal of both enantiomers before (348 K) and after (298 K) self-assembly formation at a concentration 0.5 mg/mL; SA: Self-assembly.

## 2.8 pH-responsive reversibility of self-assembly

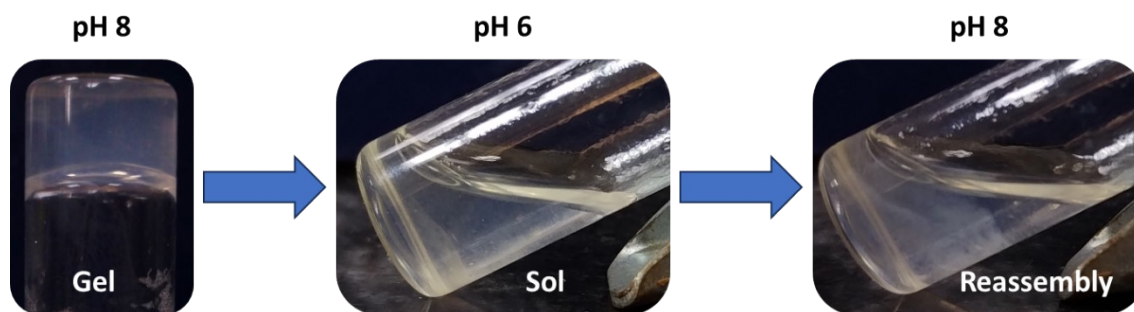

**Figure S8:** Reversibility of self-assembly formation at acidic and basic pH (concentration 1.5 mg/mL, 4 mM). An increase in turbidity is observed on increasing pH.

## 2.9 Tyndall effect of NapF-EDA self-assembly

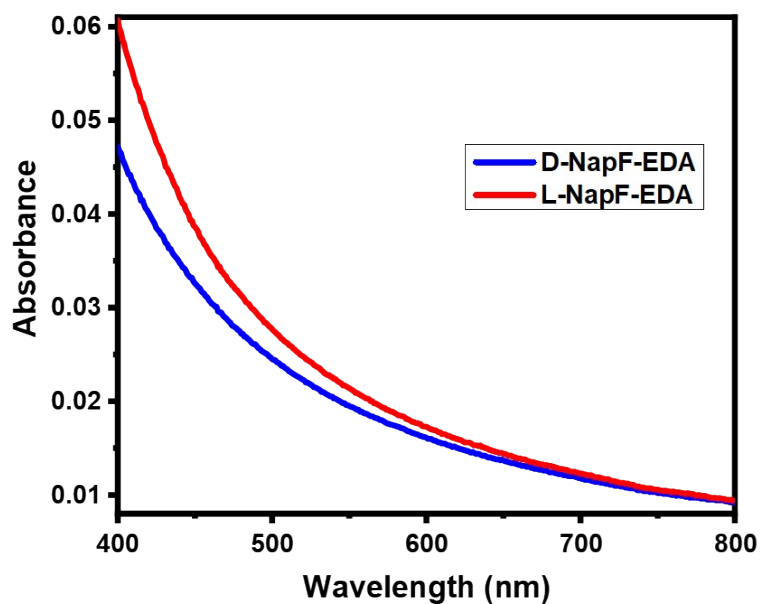

**Figure S9:** Absorbance of NapF-EDA self-assembly at 600 nm indicating Tyndall effect (concentration 0.3 mg/mL, 0.8 mM).

## 2.10 pH-responsive Zeta potential of both the enantiomers

Table S1: Zeta potential of both the enantiomers at different pH.

| pH | L-NapF-EDA (mV)  | D-NapF-EDA (mV)  |
|----|------------------|------------------|
| 5  | $-1.93 \pm 0.12$ | $-1.45 \pm 0.2$  |
| 6  | $0.25 \pm 0.1$   | $-0.52 \pm 0.05$ |
| 7  | $4.78 \pm 0.3$   | $0.47 \pm 0.13$  |
| 8  | $5.88 \pm 1.1$   | $4.80 \pm 0.5$   |
| 9  | $6.10 \pm 1$     | $5.32 \pm 0.7$   |

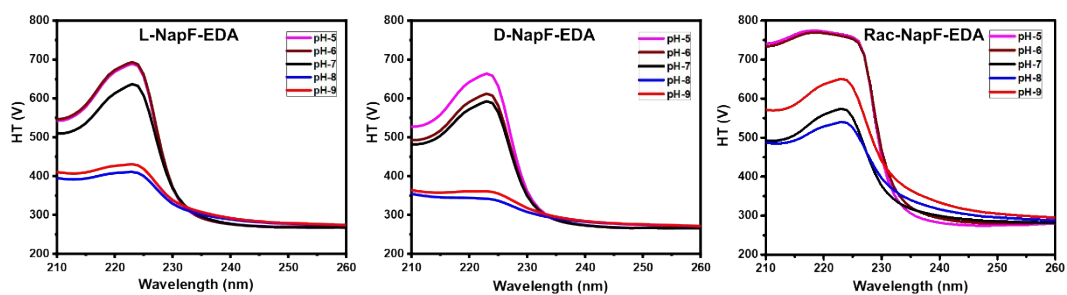

**Figure S10:** HT values obtained from CD measurement during pH-dependent CD studies (concentration 0.3 mg/mL, 0.8 mM).  
**2.11 HT values for pH-dependent CD study**

**2.12 pH-dependent reversible morphology changes**

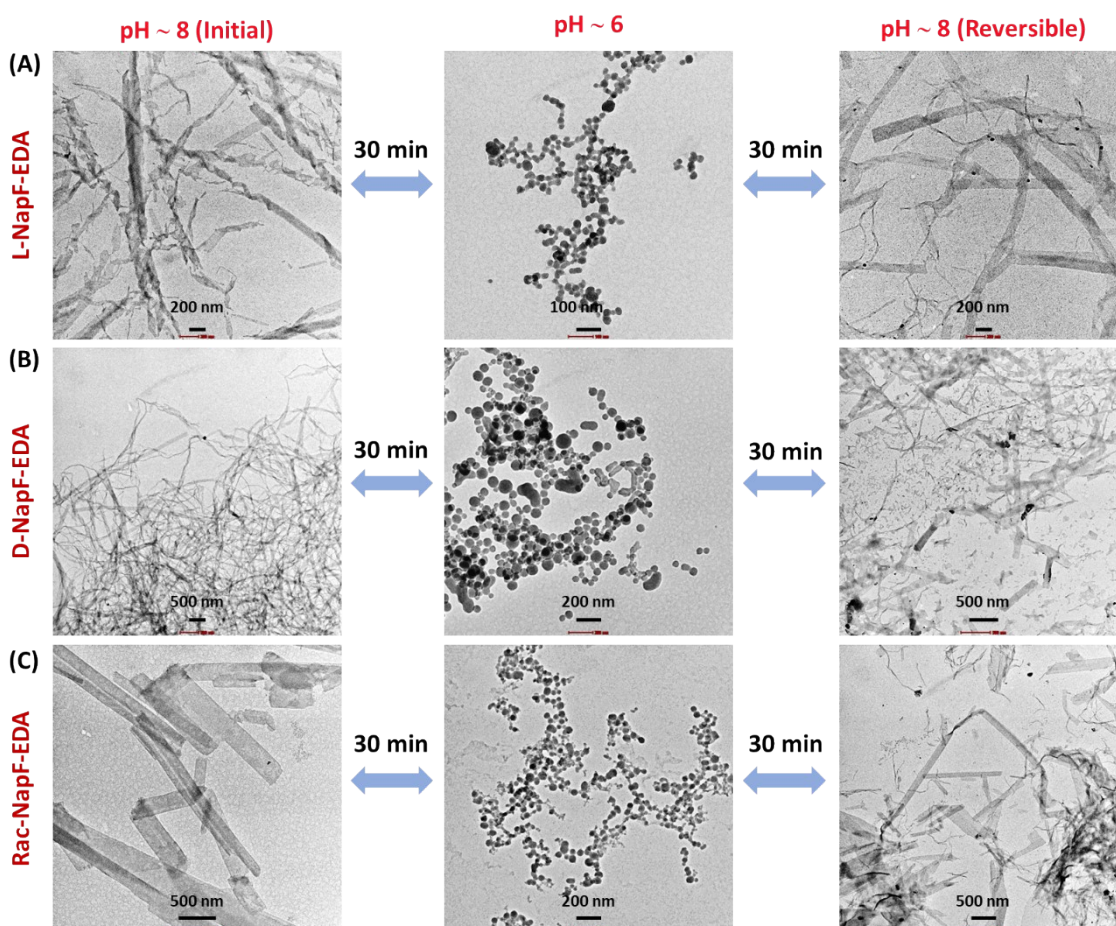

**Figure S11:** TEM images of pH-dependent reversibility of morphology changes (concentration 0.3 mg/mL, 0.8 mM).

## 2.13 Summary of differences in the self-assembling behaviour of L- and D-NapF-EDA

Table S2: Differences in various parameters of both the enantiomers.

| Parameter                                 | L-NapF-EDA                                              | D-NapF-EDA                                             |
|-------------------------------------------|---------------------------------------------------------|--------------------------------------------------------|
| Intramolecular interactions               | Stronger                                                | Weaker                                                 |
| MGC                                       | Lower (1 mg/mL)                                         | Higher (3 mg/mL)                                       |
| G' value                                  | Higher (215 Pa)                                         | Lower (40 Pa)                                          |
| CD signal @298 K, 0.5 mg/mL               | Higher (More extent of SA)                              | Lower (Lesser extent of SA)                            |
| Disassembly process                       | Rapid disassembly (Fast nucleation and Fast elongation) | Slow disassembly (Slow nucleation and Fast elongation) |
| Re-assembly process                       | Rapid                                                   | Slow                                                   |
| T <sub>m</sub> (K)                        | 312 ± 1                                                 | 317 ± 3                                                |
| α <sub>T</sub>                            | 0.225 ± 0.053                                           | 0.4502 ± 0.021                                         |
| ΔH (kJ mol <sup>-1</sup> )                | -125.12 ± 13                                            | -61.24 ± 5                                             |
| K (M <sup>-1</sup> )                      | 135.2 ± 7                                               | 411.7 ± 17                                             |
| ΔS (J mol <sup>-1</sup> K <sup>-1</sup> ) | -350.2 ± 18                                             | -141.1 ± 10                                            |
| ΔG (kJ mol <sup>-1</sup> )                | -13.055 ± 2                                             | -16.017 ± 2                                            |
| Hysteresis                                | Lesser                                                  | Larger                                                 |
| Zeta potential (@pH 7)                    | 4.8 mV                                                  | 0.5 mV                                                 |



## 2.14 NMR and Mass data

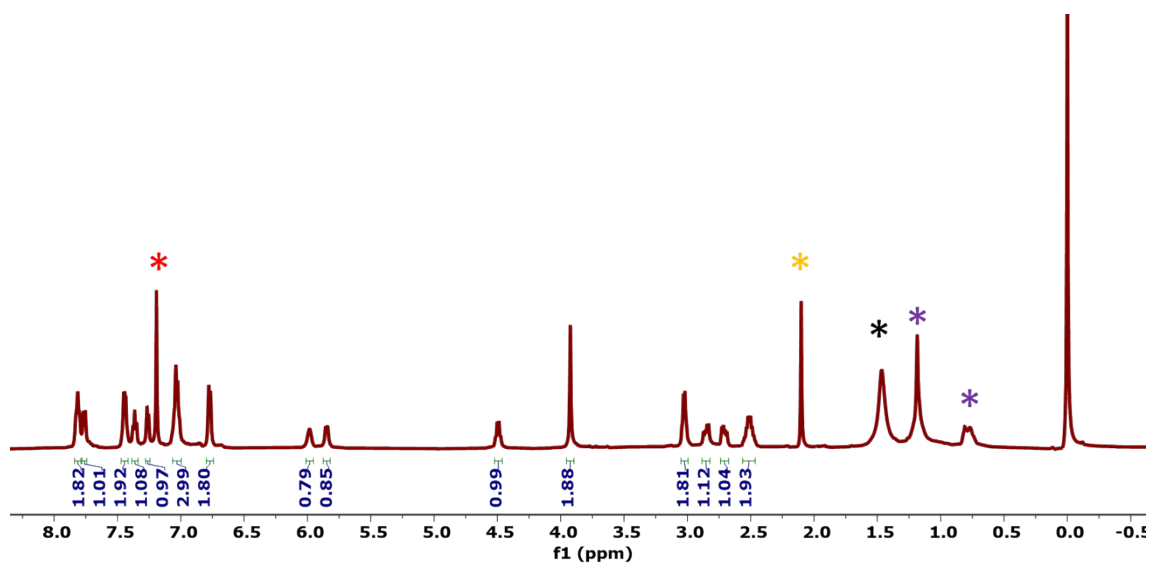

Figure S12:  $^1\text{H}$  NMR of L-NapF-EDA (500 MHz,  $\text{CDCl}_3$ ).

Figure S13: Mass data of L-NapF-EDA.

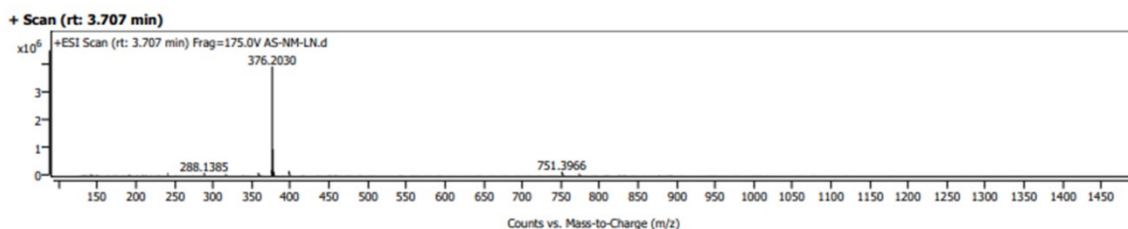

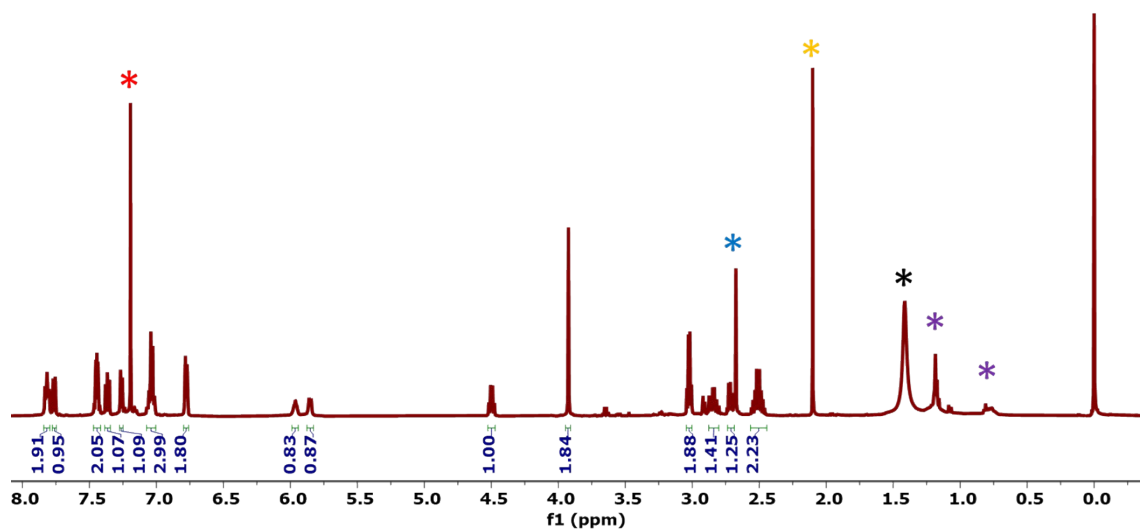

**Figure S14:**  $^1\text{H}$  NMR of D-NapF-EDA (500 MHz,  $\text{CDCl}_3$ ).

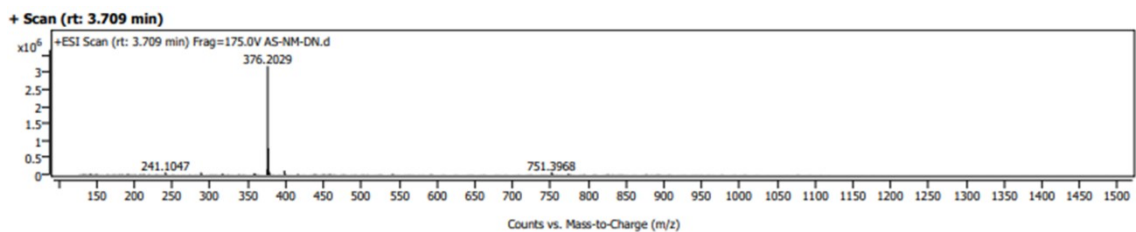

**Figure S15:** Mass data of D-NapF-EDA.



### 3.0 References

- (1) Reddy, A.; Sharma, A.; Srivastava, A. Optically Transparent Hydrogels from an Auxin–Amino-Acid Conjugate Super Hydrogelator and Its Interactions with an Entrapped Dye. *Chem. – Eur. J.* **2012**, *18* (24), 7575–7581. <https://doi.org/10.1002/chem.201103757>.
- (2) Smulders, M. M. J.; Nieuwenhuizen, M. M. L.; de Greef, T. F. A.; van der Schoot, P.; Schenning, A. P. H. J.; Meijer, E. W. How to Distinguish Isodesmic from Cooperative Supramolecular Polymerisation. *Chem. – Eur. J.* **2010**, *16* (1), 362–367. <https://doi.org/10.1002/chem.200902415>.
- (3) Revision D.01, M. J. Frisch, G. W. Trucks, H. B. Schlegel, G. E. Scuseria, M. A. Robb, J. R. Cheeseman, G. Scalmani, V. Barone, B. Mennucci, G. A. Petersson, H. Nakatsuji, M. Caricato, X. Li, H. P. Hratchian, A. F. Izmaylov, J. Bloino, G. Zheng, J. L. Sonnenberg, M. Hada, M. Ehara, K. Toyota, R. Fukuda, J. Hasegawa, M. Ishida, T. Nakajima, Y. Honda, O. Kitao, H. Nakai, T. Vreven, J. A. Montgomery, Jr., J. E. Peralta, F. Ogliaro, M. Bearpark, J. J. Heyd, E. Brothers, K. N. Kudin, V. N. Staroverov, T. Keith, R. Kobayashi, J. Normand, K. Raghavachari, A. Rendell, J. C. Burant, S. S. Iyengar, J. Tomasi, M. Cossi, N. Rega, J. M. Millam, M. Klene, J. E. Knox, J. B. Cross, V. Bakken, C. Adamo, J. Jaramillo, R. Gomperts, R. E. Stratmann, O. Yazyev, A. J. Austin, R. Cammi, C. Pomelli, J. W. Ochterski, R. L. Martin, K. Morokuma, V. G. Zakrzewski, G. A. Voth, P. Salvador, J. J. Dannenberg, S. Dapprich, A. D. Daniels, O. Farkas, J. B. Foresman, J. V. Ortiz, J. Cioslowski, and D. J. Fox, Gaussian, Inc., Wallingford CT, 2013.
